# Supplementary material for: Investigation into the Structure and Properties of Biochar Co-Activated by ZnCl2 and NaHCO3 under Low Temperature Conditions
Source: MDPI journal article supplement (doi:10.3390/ma17040942), 2024-02-18
Supplement: s1 [file s1]

# Investigation into the Structure and Properties of Biochar Co-Activated by ZnCl<sub>2</sub> and NaHCO<sub>3</sub> under Low Temperature Conditions

Hao Zhang <sup>1</sup>, Zhaozhou Wei <sup>1</sup>, Deyuan Xiong <sup>1,2,\*</sup>, Yao Wu <sup>1</sup>, Menglong Tong <sup>1</sup>, Huiping Su <sup>1</sup>, Zuoyuan Zhang <sup>1</sup> and Jian Liao <sup>1</sup>

<sup>1</sup> School of Chemistry and Chemical Engineering, Guangxi University, Nanning 530004, PR China

<sup>2</sup> Guangxi Key Laboratory of Petrochemical Resource Processing and Process Intensification Technology, School of Chemistry and Chemical Engineering, Guangxi University, Nanning 530004, China

\* Correspondence: dyxiong@gxu.edu.cn (D.X.); Tel.: +86-138-7718-2465 (D.X.)

## Text S1. Products analysis.

All liquid products were analyzed using a gas chromatograph (GC-2010, Shimadzu, Japan) equipped with a polar capillary column (Rtx-Wax, RESTEK, USA, 30 m × 0.25 mm × 0.25 μm). The split ratio was 1:50, and nitrogen gas was the carrier gas. The gas chromatograph oven temperature was set at an initial temperature of 70°C, held for 10 min, increased at a rate of 5 °C/min to 150°C, and then increased to 240°C at a rate of 15 °C/min. The injector and detector temperatures were 240°C and 280°C, respectively. The reaction reactants and products were identified by comparing the retention times of α-pinene and α-terpineol standards. The conversion of α-pinene (X), the yield of α-terpineol (Y), and the selectivity (S) of α-terpineol were calculated according to the following equations:

$$X = \frac{m_{\alpha\text{-pinene}}}{m_{\alpha\text{-pinene}}^0} \times 100\% \quad (1)$$

$$Y = \frac{m_{\alpha\text{-terpienol}}}{\frac{M_{\alpha\text{-terpienol}}}{M_{\alpha\text{-pinene}}} \times m_{\alpha\text{-pinene}}^0} \times 100\% \quad (2)$$

$$S = \frac{Y}{X} \times 100\% \quad (3)$$

where  $m_{\alpha\text{-pinene}}^0$  was the initially added volume of the α-pinene,  $m_{\alpha\text{-pinene}}$  was the mass of α-pinene consumed (g),  $m_{\alpha\text{-terpienol}}$  was the mass of α-terpineol (g).  $M_{\alpha\text{-terpineol}}$  and  $M_{\alpha\text{-pinene}}$  were the relative molecular mass of α-terpineol and α-pinene, respectively.

## Text S2. Acid-base titration experiment.

**Determination of Total Acid Value ( $A_{\text{Total}}$ ):** The 0.25 g sample was accurately weighed using an analytical balance. Subsequently, 25 mL of a 0.05 mol/L NaOH standard solution was added to the weighed sample in a 100 mL beaker. The beaker was placed in a temperature-controlled ultrasonic cleaner at room temperature for one hour. After ultrasonic cleaning, the mixture was filtered, and the filtrate was collected in a conical flask. Methyl orange was added as an indicator, and titration was conducted using a 0.05 mol/L HCl standard solution. The titration was continued, with constant agitation, until the solution in the conical flask transitioned to a red colour. The volume of the consumed HCl standard solution was then recorded. The calculation formula for total acid value  $A_{\text{Total}}$  is as follows:

$$A_{\text{Total}} = \frac{0.05 \times 25 - 0.05x_1}{m} \text{ mmol/g} \quad (4)$$

where  $A_{\text{Total}}$  represents the total acid value, unit mmol/g;  $x_1$  represents the volume of HCl consumed, unit mL; and  $m$  represents the mass of the sample to be tested, unit g.

**Determination of Carboxylic Acid Value ( $A_{\text{-COOH}}$ ) of HPCs:** A total of 0.25 g of the HPCs was accurately weighed using an analytical balance. Subsequently, 25 mL of a  $\text{NaHCO}_3$  standard solution with a concentration of 0.05 mol/L was measured using a graduated cylinder. This solution was transferred to a 100 mL beaker, which was then placed in a CNC ultrasonic cleaner and subjected to ultrasonication at room temperature for one hour. Following ultrasonication, the solution was filtered, and the filtrate was collected in a conical flask. Methyl orange was introduced as an indicator, and the answer was titrated with a standard HCl solution of 0.05 mol/L concentration. The conical flask was agitated until the solution attained a red hue, and then the volume of the common HCl solution expended was recorded. The calculation formula for carboxylic acid value  $A_{\text{-COOH}}$  is as follows:

$$A_{\text{-COOH}} = \frac{0.05 \times 25 - 0.05x_2}{m} \text{ mmol/g} \quad (5)$$

Among them,  $A_{\text{-COOH}}$  represents the carboxylic acid value, with a unit of mmol/g;  $x_2$  represents the volume of HCl consumed, unit mL; and  $m$  represents the mass of HPCs to be tested, unit g.

Calculation of Weak Acid Content ( $A_{\text{-OH}}$ ) of HPCs:

$$A_{\text{-OH}} = A_{\text{Total}} - A_{\text{-COOH}} \quad (6)$$

where  $A_{\text{-OH}}$  represents the weak acid content, unit mmol/g.

**Calculation of Strong Acid Content ( $A_{\text{HPW}}$ ) of HPW/AC450-4:8:2:** A 0.25 g of catalyst was weighed precisely using an analytical balance. Then, 25 mL of a NaCl standard solution with a concentration of 0.05 mol/L was measured in a cylinder and transferred into a 100 mL beaker. Next, the beaker was placed in a CNC ultrasonic cleaner and sonicated for 1 h at room temperature. After filtering the cleaned sample, the filtrate was collected in a conical flask containing 25 ml 0.05 mol/L NaOH. Methyl orange was added as an indicator, and back-titration was conducted using a 0.05 mol/L HCl standard solution. The titration was continued, with constant agitation, until the solution in the conical flask transitioned to a red colour. The volume of the consumed HCl standard solution was then recorded. The calculation formula for total acid value  $A_{\text{HPW}}$  is as follows:

$$A_{\text{HPW}} = \frac{0.05 \times 25 - 0.05x_3}{m} \text{ mmol/g} \quad (7)$$

where  $A_{\text{HPW}}$  represents the strong acid value, unit mmol/g;  $x_3$  represents the volume of HCl consumed, unit mL; and  $m$  represents the mass of the sample to be tested, unit g.

Calculation of Strong Acid Content ( $A_{\text{HPW}}$ ) of HPW after calcination: It is referred to the  $A_{\text{Total}}$  calculation method.

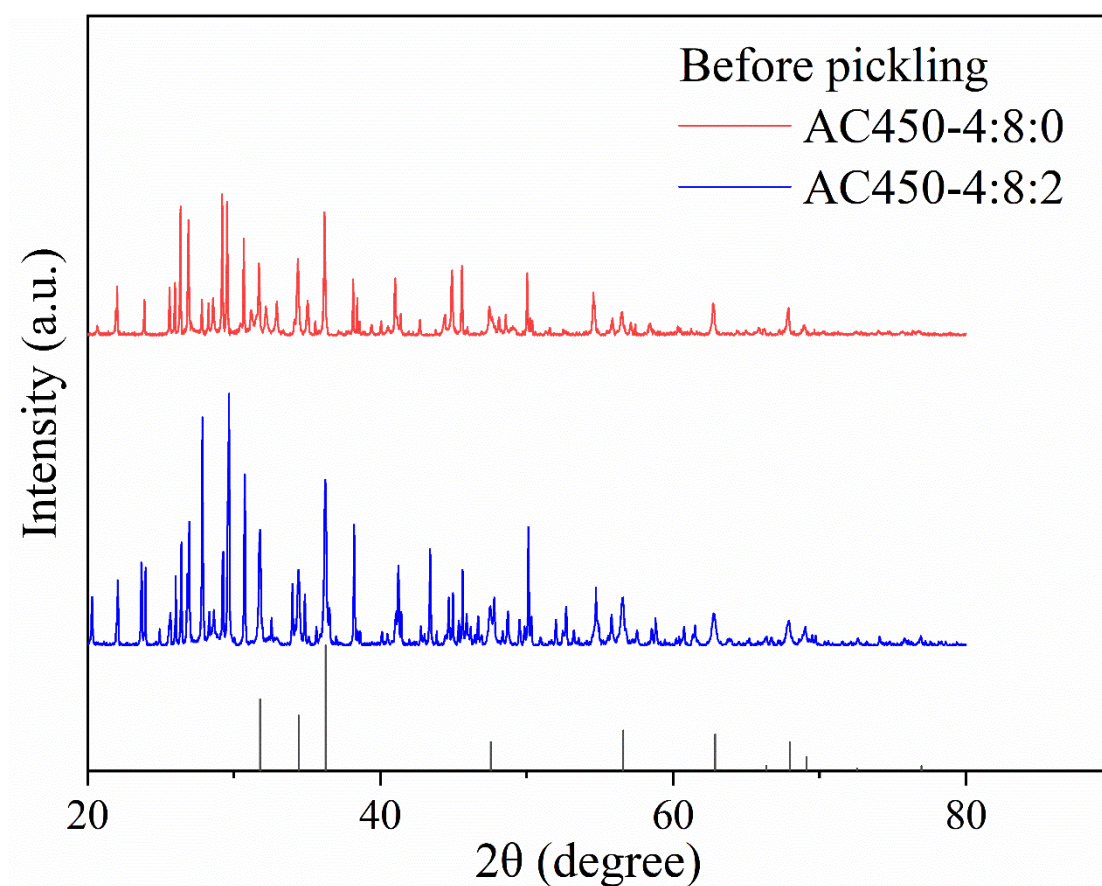

**Figure S1.** XRD patterns of the carbonized products of LS/activators compound precursors.



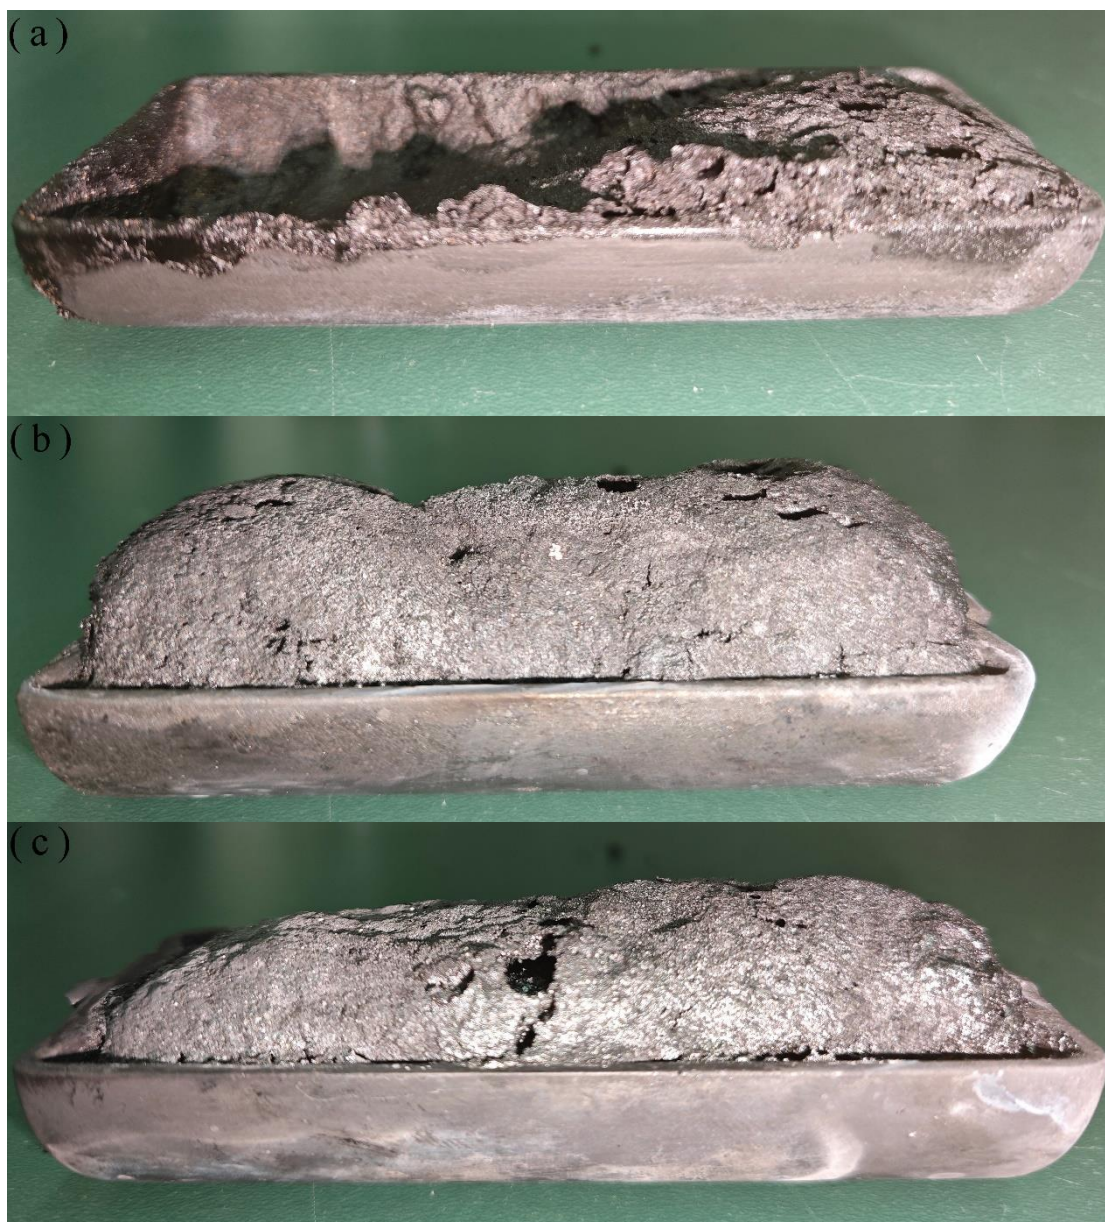

**Figure S2.** Photo of HPCs before pickling (a), AC250-4:8:2(b), AC350-4:8:2 (c), and AC450-4:8:2.

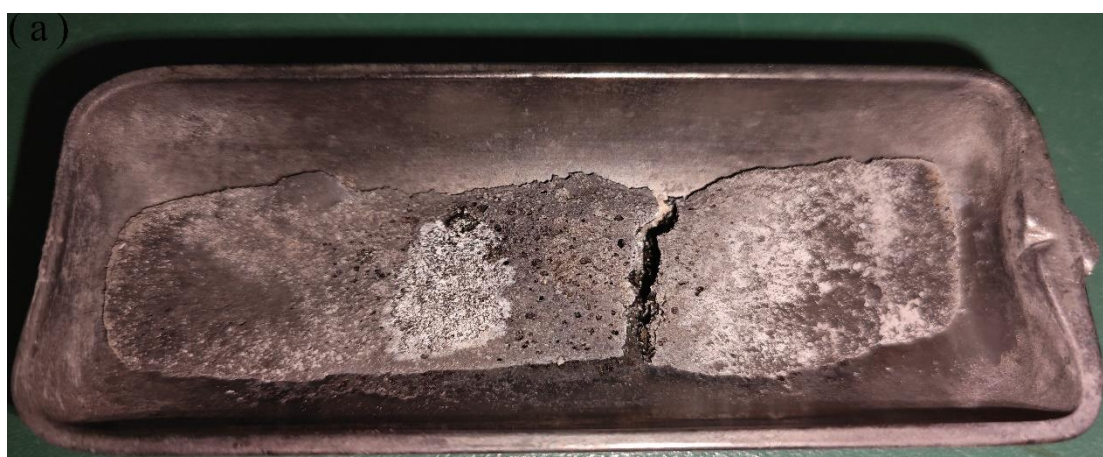



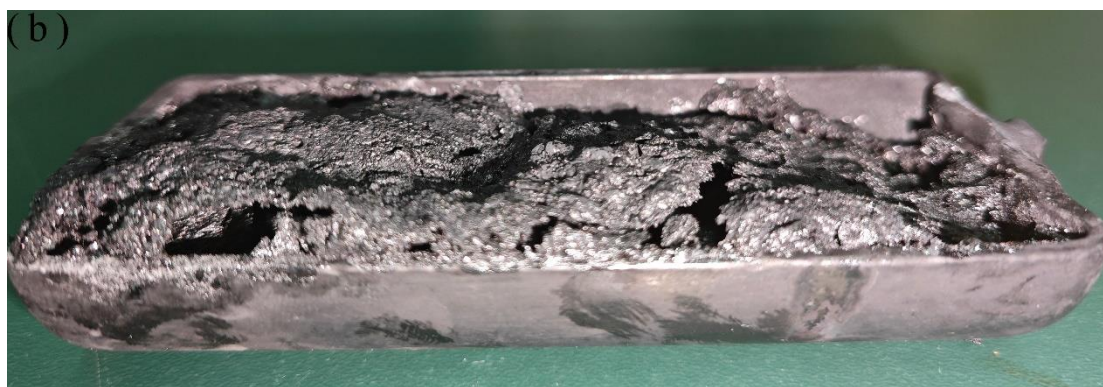

**Figure S3.** Photo of HPCs before pickling (a), AC450-4:0:2(b), AC450-4:8:0.

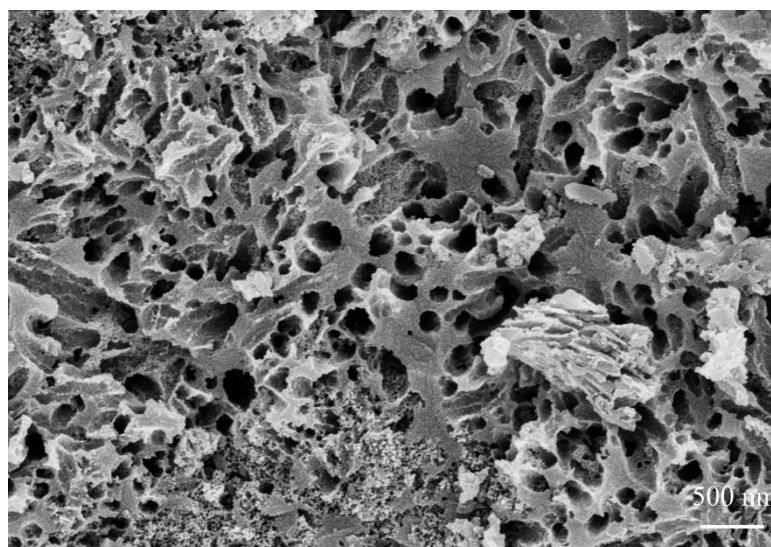

**Figure S4.** SEM images of AC450-4:0:2.

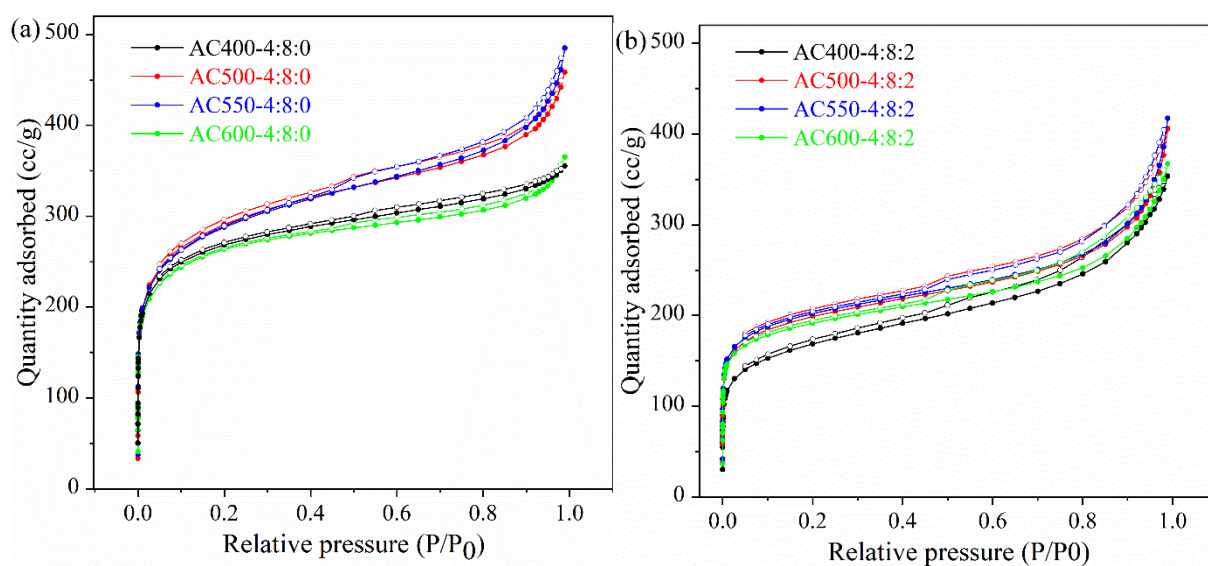

**Figure S5.** N<sub>2</sub> adsorption and desorption isotherm of HPCS (a) ACT-4:8:0, (b) ACT-4:8:2.

**Table S1.** Summary of the surface area, pore volume values, and pore size.

| HPCs        | S <sub>BET</sub> (m <sup>2</sup> /g) | V <sub>total</sub> (cc/g) | V <sub>micro</sub> (cc/g) | V <sub>meso</sub> (cc/g) | V <sub>meso</sub> /V <sub>Total</sub> (%) | D <sub>pore</sub> (nm) |
|-------------|--------------------------------------|---------------------------|---------------------------|--------------------------|-------------------------------------------|------------------------|
| AC400-4:8:0 | 995.3                                | 0.551                     | 0.404                     | 0.147                    | 26.7%                                     | 2.21                   |

|             |        |       |       |       |       |      |
|-------------|--------|-------|-------|-------|-------|------|
| AC450-4:8:0 | 1017.1 | 0.595 | 0.402 | 0.193 | 32.4% | 2.34 |
| AC500-4:8:0 | 1060.3 | 0.709 | 0.417 | 0.292 | 41.2% | 2.68 |
| AC550-4:8:0 | 1046.6 | 0.752 | 0.410 | 0.342 | 45.5% | 2.87 |
| AC600-4:8:0 | 972.3  | 0.565 | 0.381 | 0.184 | 32.6% | 2.32 |
| AC400-4:8:2 | 609.0  | 0.547 | 0.250 | 0.297 | 55.0% | 3.59 |
| AC450-4:8:2 | 736.5  | 0.752 | 0.273 | 0.479 | 63.7% | 4.35 |
| AC500-4:8:2 | 737.8  | 0.628 | 0.288 | 0.340 | 54.1% | 3.29 |
| AC550-4:8:2 | 746.8  | 0.647 | 0.294 | 0.354 | 54.7% | 3.47 |
| AC600-4:8:2 | 709.1  | 0.568 | 0.280 | 0.288 | 50.7% | 3.20 |

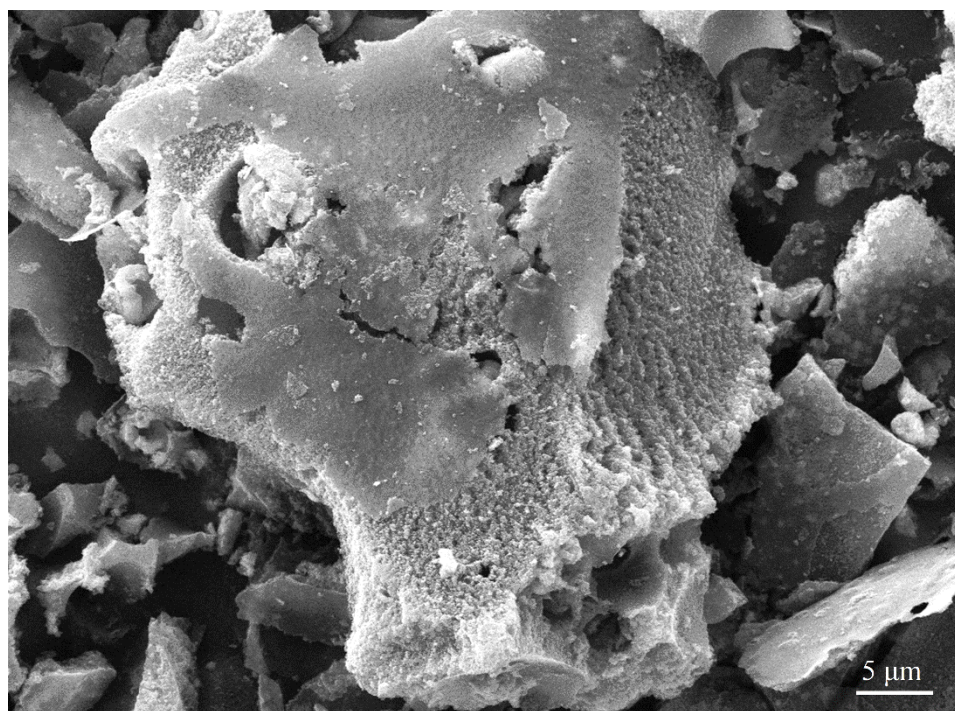

**Figure S6.** SEM image of HPW/AC450-4:8:2.



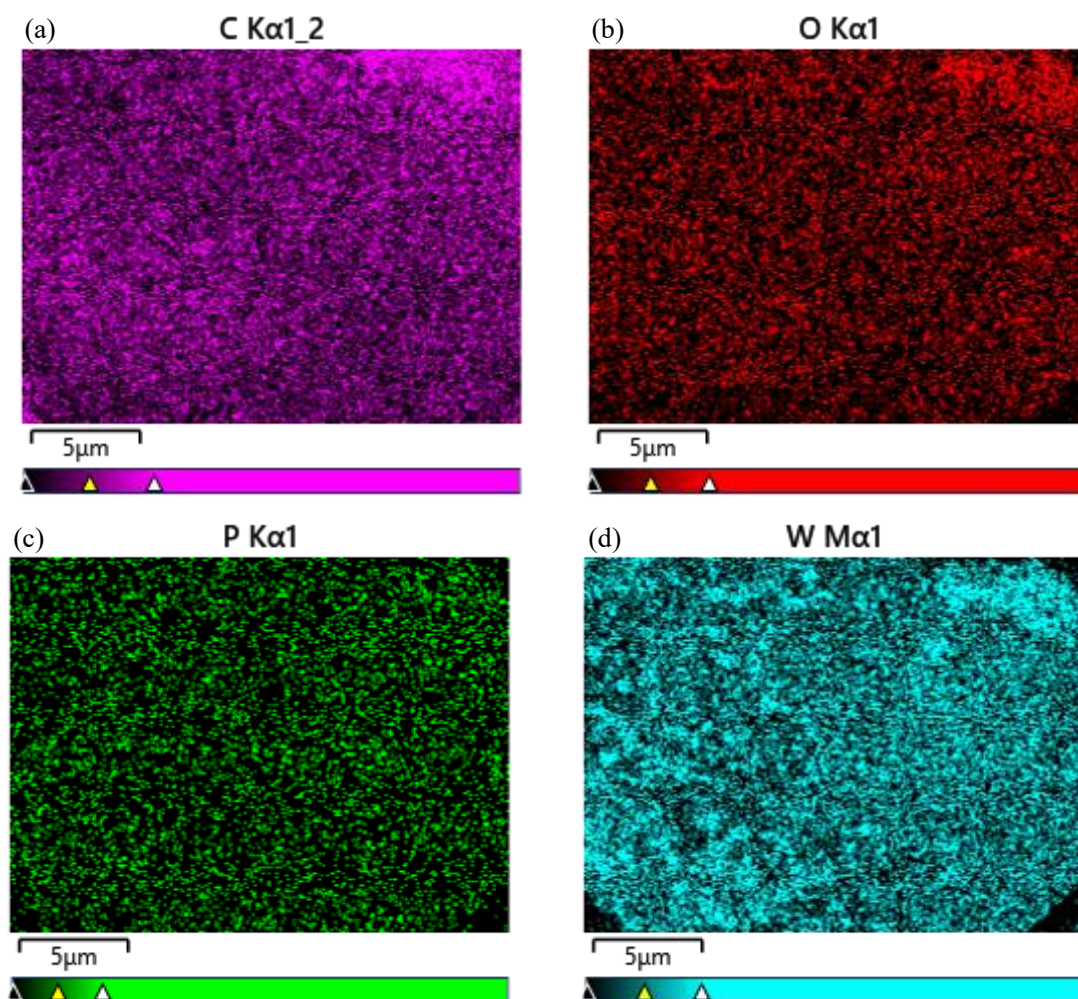

Figure S7. EDX spectrum of HPW/AC450-4:8:2.
